# Supplementary material for: RNA sequencing of corneas from two keratoconus patient groups identifies potential biomarkers and decreased NRF2-antioxidant responses
Source: PubMed Central journal article supplement (PMC7303170; doi:10.1038/s41598-020-66735-x), 2020-06-18
Supplement: 41598_2020_66735_MOESM3_ESM.pdf [file 41598_2020_66735_MOESM3_ESM.pdf]

**Supplemental Table S1:** Patient demographics and clinical characteristics.\*

| Sample ID                                                   | Group   | Age in years | Sex | Ancestry | Atopy/Allergy                    | Disease Severity |
|-------------------------------------------------------------|---------|--------------|-----|----------|----------------------------------|------------------|
| LE2C                                                        | control | 64           | F   | EA       | NA                               | NA               |
| LE4C                                                        | control | 58           | M   | EA       | NA                               | NA               |
| LE6C                                                        | control | 64           | F   | EA       | NA                               | NA               |
| DN5487                                                      | control | 25           | F   | AA       | NA                               | NA               |
| DN5511                                                      | control | 52           | M   | AA       | NA                               | NA               |
| DN76411                                                     | control | 64           | F   | AA       | NA                               | NA               |
| DN76507                                                     | control | 75           | M   | AA       | NA                               | NA               |
| KC276                                                       | case    | 24           | M   | U        | Absent                           | Severe           |
| KC366                                                       | case    | 29           | F   | AA       | Absent                           | Severe           |
| KC369                                                       | case    | 46           | F   | AA       | Absent                           | Severe           |
| KC388                                                       | case    | 20           | M   | AA       | Eczema, hay fever, allergies     | Severe           |
| KC395                                                       | case    | 17           | M   | AA       | Absent                           | Severe           |
| KC400                                                       | case    | 69           | M   | AA       | Asthma                           | Severe           |
| KC406                                                       | case    | 48           | F   | AA       | Absent                           | Severe           |
| KJ04                                                        | case    | 20           | M   | ME       | Absent                           | Severe           |
| KJ05                                                        | case    | 21           | M   | ME       | Vernal keratoconjunctivitis      | Severe           |
| KJ06                                                        | case    | 33           | F   | ME       | Absent                           | Severe           |
| KJ09                                                        | case    | 27           | F   | ME       | Seasonal allergic conjunctivitis | Severe           |
| KJ10                                                        | case    | 23           | M   | ME       | Absent                           | Severe           |
| KJ11                                                        | case    | 18           | F   | ME       | Vernal keratoconjunctivitis      | Severe           |
| KJ12                                                        | case    | 25           | M   | ME       | Vernal keratoconjunctivitis      | Severe           |
| KJ13                                                        | case    | 27           | F   | ME       | Absent                           | Severe           |
| KJ14                                                        | case    | 29           | M   | ME       | Absent                           | Severe           |
| KJ17                                                        | case    | 36           | F   | ME       | Absent                           | Severe           |
| KJ22                                                        | case    | 36           | M   | ME       | Absent                           | Severe           |
| KJ25                                                        | case    | 32           | F   | ME       | Absent                           | Severe           |
| <i>Samples not used in differential expression analysis</i> |         |              |     |          |                                  |                  |
| DN373                                                       | control | U            | U   | U        | NA                               | NA               |
| DN401                                                       | control | 69           | F   | U        | NA                               | NA               |

**\*Sample sources:** DN and LE are control samples from the Lions Eye Institute for Transplant and Research, Florida; DN373 and DN401 are control samples from the Wilmer Eye Institute, Johns Hopkins University School of Medicine, Baltimore, USA; KC are Keratoconus patient samples from the Wilmer Eye Institute, Johns Hopkins University School of Medicine, Baltimore, USA; and, KJ are Keratoconus patient samples from the King Khalid Eye hospital, Riyadh, Saudi Arabia. **Abbreviations:** Case/control: Keratoconus/disease-free subjects; F/M: female/male; EA/AA/ME: European American/African American/Middle Eastern; NA: not applicable; U: unknown.
