# Supplementary material for: RNA sequencing of corneas from two keratoconus patient groups identifies potential biomarkers and decreased NRF2-antioxidant responses
Source: PubMed Central journal article supplement (PMC7303170; doi:10.1038/s41598-020-66735-x), 2020-06-18
Supplement: 41598_2020_66735_MOESM4_ESM.pdf [file 41598_2020_66735_MOESM4_ESM.pdf]

**Supplemental Table S2:** Corneal samples RNA yield and quality.

| <b>Sample ID</b>                                            | <b>RNA yield (µg)</b> | <b>RIN #</b> | <b>Library size (bp)</b> | <b>Total # reads</b> | <b>GC (%)</b> | <b>Q20 (%)</b> | <b>Q30 (%)</b> |
|-------------------------------------------------------------|-----------------------|--------------|--------------------------|----------------------|---------------|----------------|----------------|
| LE2C                                                        | 3.41                  | 9.3          | 284                      | 60,869,200           | 49.48         | 96.08          | 93.28          |
| LE4C                                                        | 1.17                  | 8.7          | 283                      | 73,679,166           | 48.74         | 96.16          | 93.42          |
| LE6C                                                        | 1.12                  | 9.3          | 308                      | 84,290,920           | 49.59         | 95.99          | 93.13          |
| DN5487                                                      | 1.90                  | 7.3          | 283                      | 84,275,090           | 51.34         | 95.29          | 91.92          |
| DN5511                                                      | 2.95                  | 7.6          | 279                      | 68,279,876           | 52.69         | 95.57          | 92.36          |
| DN76411                                                     | 3.98                  | 8.0          | 270                      | 63,343,026           | 52.79         | 95.80          | 92.72          |
| DN76507                                                     | 6.25                  | 6.9          | 275                      | 61,435,316           | 53.23         | 95.59          | 92.37          |
| KC276_2                                                     | 1.12                  | 8.5          | 279                      | 59,776,822           | 52.49         | 95.47          | 92.20          |
| KC366_2                                                     | 0.72                  | 7.9          | 277                      | 61,019,468           | 51.68         | 95.76          | 92.66          |
| KC369_2                                                     | 1.01                  | 8.8          | 275                      | 62,422,154           | 51.39         | 95.34          | 91.98          |
| KC388_2                                                     | 1.42                  | 9.7          | 280                      | 63,850,040           | 52.90         | 95.63          | 92.44          |
| KC395_2                                                     | 0.94                  | 7.7          | 286                      | 73,387,096           | 51.10         | 94.96          | 91.43          |
| KC400_2                                                     | 0.91                  | 8.8          | 281                      | 64,445,560           | 52.20         | 95.33          | 91.97          |
| KJ04                                                        | 2.15                  | 8.0          | 284                      | 70,504,602           | 50.45         | 95.18          | 91.76          |
| KJ05                                                        | 3.82                  | 8.2          | 283                      | 61,149,826           | 49.97         | 95.51          | 92.32          |
| KJ06                                                        | 2.90                  | 8.7          | 279                      | 57,686,834           | 49.58         | 95.70          | 92.64          |
| KJ09                                                        | 0.45                  | 8.6          | 279                      | 64,356,492           | 48.67         | 95.92          | 93.03          |
| KJ10                                                        | 1.52                  | 7.8          | 279                      | 63,822,798           | 49.40         | 95.98          | 93.11          |
| KJ11                                                        | 3.70                  | 5.2          | 282                      | 76,409,238           | 50.44         | 95.38          | 92.14          |
| KJ12                                                        | 0.36                  | 7.3          | 279                      | 64,008,804           | 49.27         | 95.78          | 92.79          |
| KJ13                                                        | 1.68                  | 8.5          | 279                      | 77,471,920           | 49.43         | 95.75          | 92.74          |
| KJ14                                                        | 1.80                  | 7.8          | 286                      | 59,141,526           | 49.85         | 95.80          | 92.83          |
| KJ17                                                        | 0.73                  | 8.0          | 286                      | 63,144,364           | 49.19         | 95.88          | 92.95          |
| KJ22                                                        | 0.85                  | 5.2          | 283                      | 60,963,934           | 48.72         | 95.65          | 92.57          |
| KJ25                                                        | 0.88                  | 7.7          | 284                      | 57,934,452           | 49.36         | 95.64          | 92.56          |
| <i>Samples not used in differential expression analysis</i> |                       |              |                          |                      |               |                |                |
| DN373                                                       | 1.20                  | 7.5          | 286                      | 72,562,042           | 49.25         | 95.33          | 92.04          |
| DN401                                                       | 2.16                  | 8.2          | 279                      | 72,695,846           | 50.23         | 95.60          | 92.47          |
| DN401_2                                                     | 2.16                  | 8.2          | 276                      | 60,527,396           | 52.49         | 95.72          | 92.60          |
| KC406                                                       | 0.76                  | 8.9          | 279                      | 63,544,028           | 52.38         | 95.46          | 92.19          |
| KC276                                                       | 1.12                  | 8.5          | 282                      | 55,493,880           | 49.25         | 95.35          | 92.09          |
| KC366                                                       | 0.72                  | 7.9          | 279                      | 77,267,478           | 48.97         | 95.64          | 92.54          |
| KC369                                                       | 1.01                  | 8.8          | 291                      | 72,489,898           | 48.79         | 95.11          | 91.68          |
| KC388                                                       | 1.42                  | 9.7          | 285                      | 62,251,528           | 49.84         | 95.46          | 92.24          |
| KC395                                                       | 0.94                  | 7.7          | 281                      | 65,026,054           | 49.20         | 94.82          | 91.23          |
| KC400                                                       | 0.91                  | 8.8          | 277                      | 74,484,644           | 49.58         | 95.18          | 91.80          |
| KC406                                                       | 0.76                  | 8.9          | 281                      | 74,740,710           | 49.17         | 95.42          | 92.20          |
