# Supplementary material for: RNA sequencing of corneas from two keratoconus patient groups identifies potential biomarkers and decreased NRF2-antioxidant responses
Source: PubMed Central journal article supplement (PMC7303170; doi:10.1038/s41598-020-66735-x), 2020-06-18
Supplement: 41598_2020_66735_MOESM8_ESM.pdf [file 41598_2020_66735_MOESM8_ESM.pdf]

**Supplemental Table S6: The ten most increased and decreased DEG.\*****A. Ten most increased in KC samples**

| Gene symbol      | Gene name                           | KC | KJ |
|------------------|-------------------------------------|----|----|
| <i>LRRC15</i>    | Leucine Rich Repeat Containing 15   | +  | -  |
| <i>COL3A1</i>    | Collagen Type III Alpha 1 Chain     | +  | -  |
| <i>COL1A1</i>    | Collagen Type I Alpha 1 Chain       | +  | -  |
| <i>TMEM119</i>   | Transmembrane Protein 119           | +  | -  |
| <i>MMP11</i>     | Matrix Metalloproteinase 11         | +  | -  |
| <i>TNC</i>       | Tenascin C                          | +  | -  |
| <i>C3</i>        | Complement C3                       | +  | -  |
| <i>THBS2</i>     | Thrombospondin 2                    | +  | +  |
| <i>TNFRSF11B</i> | TNF Receptor Superfamily Member 11b | +  | -  |
| <i>FN1</i>       | Fibronectin 1                       | +  | -  |

**B. Ten most increased in KJ samples**

| Gene symbol     | Gene name                                                  | KC | KJ |
|-----------------|------------------------------------------------------------|----|----|
| <i>S100A9</i>   | S100 Calcium Binding Protein A9                            | -  | +  |
| <i>S100A8</i>   | S100 Calcium Binding Protein A8                            | -  | +  |
| <i>AOC1</i>     | Amine Oxidase Copper Containing 1                          | -  | +  |
| <i>MAB21L1</i>  | Mab-21 Like 1                                              | -  | +  |
| <i>LGALS9C</i>  | Galectin 9C                                                | -  | +  |
| <i>CLIC3</i>    | Chloride Intracellular Channel 3                           | -  | +  |
| <i>ADAMTS14</i> | ADAM Metalloproteinase with Thrombospondin Type 1 Motif 14 | -  | +  |
| <i>KRT78</i>    | Keratin 78                                                 | -  | +  |
| <i>LYPD2</i>    | LY6/PLAUR Domain Containing 2                              | +  | +  |
| <i>LCN2</i>     | Lipocalin 2                                                | -  | +  |

**C. Ten most decreased in KC and KJ samples**

| Gene symbol     | Gene name                                                | KC | KJ |
|-----------------|----------------------------------------------------------|----|----|
| <i>HSPA6</i>    | Heat Shock Protein Family A (Hsp70) Member 6             | +  | +  |
| <i>IL1A</i>     | Interleukin 1 Alpha                                      | +  | +  |
| <i>CA3</i>      | Carbonic Anhydrase 3                                     | +  | +  |
| <i>PLAUR</i>    | Plasminogen Activator, Urokinase Receptor                | +  | +  |
| <i>FOSL1</i>    | FOS Like 1, AP-1 Transcription Factor Subunit            | +  | +  |
| <i>ATF3</i>     | Activating Transcription Factor 3                        | +  | +  |
| <i>HMOX1</i>    | Heme Oxygenase 1                                         | +  | +  |
| <i>CXCL1</i>    | C-X-C Motif Chemokine Ligand 1                           | +  | -  |
| <i>DUSP5</i>    | Dual Specificity Phosphatase 5) is a Protein Coding gene | +  | +  |
| <i>SERPINB2</i> | Serpin Family B Member 2) is a Protein Coding gene       | +  | +  |
| <i>CXCL8</i>    | C-X-C Motif Chemokine Ligand 8                           | -  | +  |
| <i>LIF</i>      | LIF Interleukin 6 Family Cytokine                        | -  | +  |
| <i>NR4A1</i>    | Nuclear Receptor Subfamily 4 Group A Member 1            | +  | +  |
| <i>AREG</i>     | Amphiregulin                                             | +  | +  |
| <i>SLC2A3</i>   | Solute Carrier Family 2 Member 3                         | +  | +  |

\*+ and – refer to statistically significant and not significant results in each sample set.
