# Supplementary material for: RNA sequencing of corneas from two keratoconus patient groups identifies potential biomarkers and decreased NRF2-antioxidant responses
Source: PubMed Central journal article supplement (PMC7303170; doi:10.1038/s41598-020-66735-x), 2020-06-18
Supplement: 41598_2020_66735_MOESM9_ESM.pdf [file 41598_2020_66735_MOESM9_ESM.pdf]

**Supplemental Table S7: List of TaqMan Primers**

|   | <b>Gene</b> | <b>Catalog Number</b> | <b>Vendor</b>            |
|---|-------------|-----------------------|--------------------------|
| 1 | ICAM1       | Hs00164932            | Thermo Fisher Scientific |
| 2 | SOD2        | Hs00167309            | Thermo Fisher Scientific |
| 3 | TUBB3       | Hs00801390            | Thermo Fisher Scientific |
| 4 | TUBB2A      | Hs00742533            | Thermo Fisher Scientific |
| 5 | RXRA        | Hs01067640            | Thermo Fisher Scientific |
| 6 | MFAP3L      | Hs04189224            | Thermo Fisher Scientific |
| 7 | HSP40       | Hs01039243_g1         | Thermo Fisher Scientific |
| 8 | GAS1        | Hs04997460_s1         | Thermo Fisher Scientific |
